# Supplementary material for: Comorbid diabetes results in immune dysregulation and enhanced disease severity following MERS-CoV infection
Source: JCI journal article supplement (doi:10.1172/jci.insight.131774), 2019-09-24
Supplement: sd1 [file 1]

**Supplemental Material**

**Comorbid diabetes results in immune dysregulation and enhanced  
disease severity following MERS-CoV infection**

**Kirsten A. Kulcsar<sup>1</sup>, Christopher M. Coleman<sup>1#</sup>, Sarah E. Beck<sup>2</sup>, Matthew B. Frieman<sup>1\*</sup>**

<sup>1</sup>University of Maryland School of Medicine, Department of Microbiology and Immunology,  
Baltimore MD USA 21201

<sup>2</sup>Johns Hopkins University School of Medicine, Department of Molecular and Comparative  
Pathobiology, Baltimore, MD USA 21205

<sup>#</sup>Currently at University of Nottingham School of Life Sciences, Division of Infections,  
Immunity, and Microbes, Nottingham, UK

\*To whom correspondence should be addressed: Matthew Frieman, 685 W. Baltimore St. Room  
380, Baltimore, MD 21205; (410) 706-2539; [mfrieman@som.umaryland.edu](mailto:mfrieman@som.umaryland.edu)

## Supplementary Figures and Tables

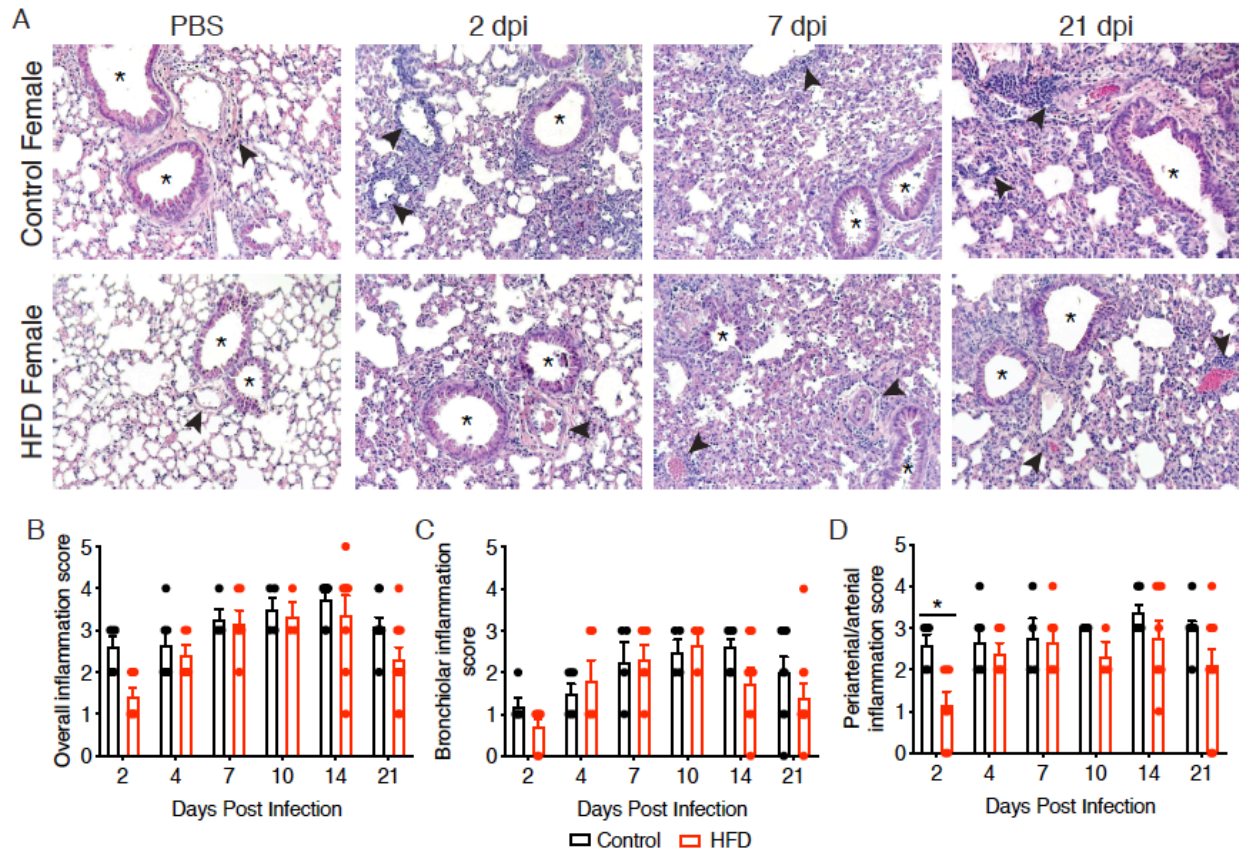

**Figure S1. Lung histology shows a slight delay of inflammation in female HFD mice infected with MERS-CoV.** Female HFD and control DPP4<sup>H/M</sup> mice were infected intranasally with  $1.5 \times 10^5$  pfu of MERS-CoV Jordan. A) Lungs were collected at days 2, 4, 7, 10, 14 and 21 after infection and fixed in 10% neutral buffered formalin for >24 hrs. Tissue was embedded in paraffin and 5um sections were cut and stained with hematoxylin and eosin. Blood vessels are marked by arrow heads and airways are marked by asterisk (\*). Images are shown at 10x and are representative of n= 5-11 mice/group from 2-3 independent experiments. B) Overall lung inflammation, (C) bronchiolar inflammation, and (D) perivascular inflammation were scored by a board certified veterinarian. The data are pooled from 2-3 independent experiments, n= 5-11

mice/group. Data are presented as the mean and SEM. \* $p < 0.05$ , \*\*\* $p < 0.001$ , and \*\*\*\* $p < 0.0001$  as determined by two-way ANOVA with Sidak's post test.

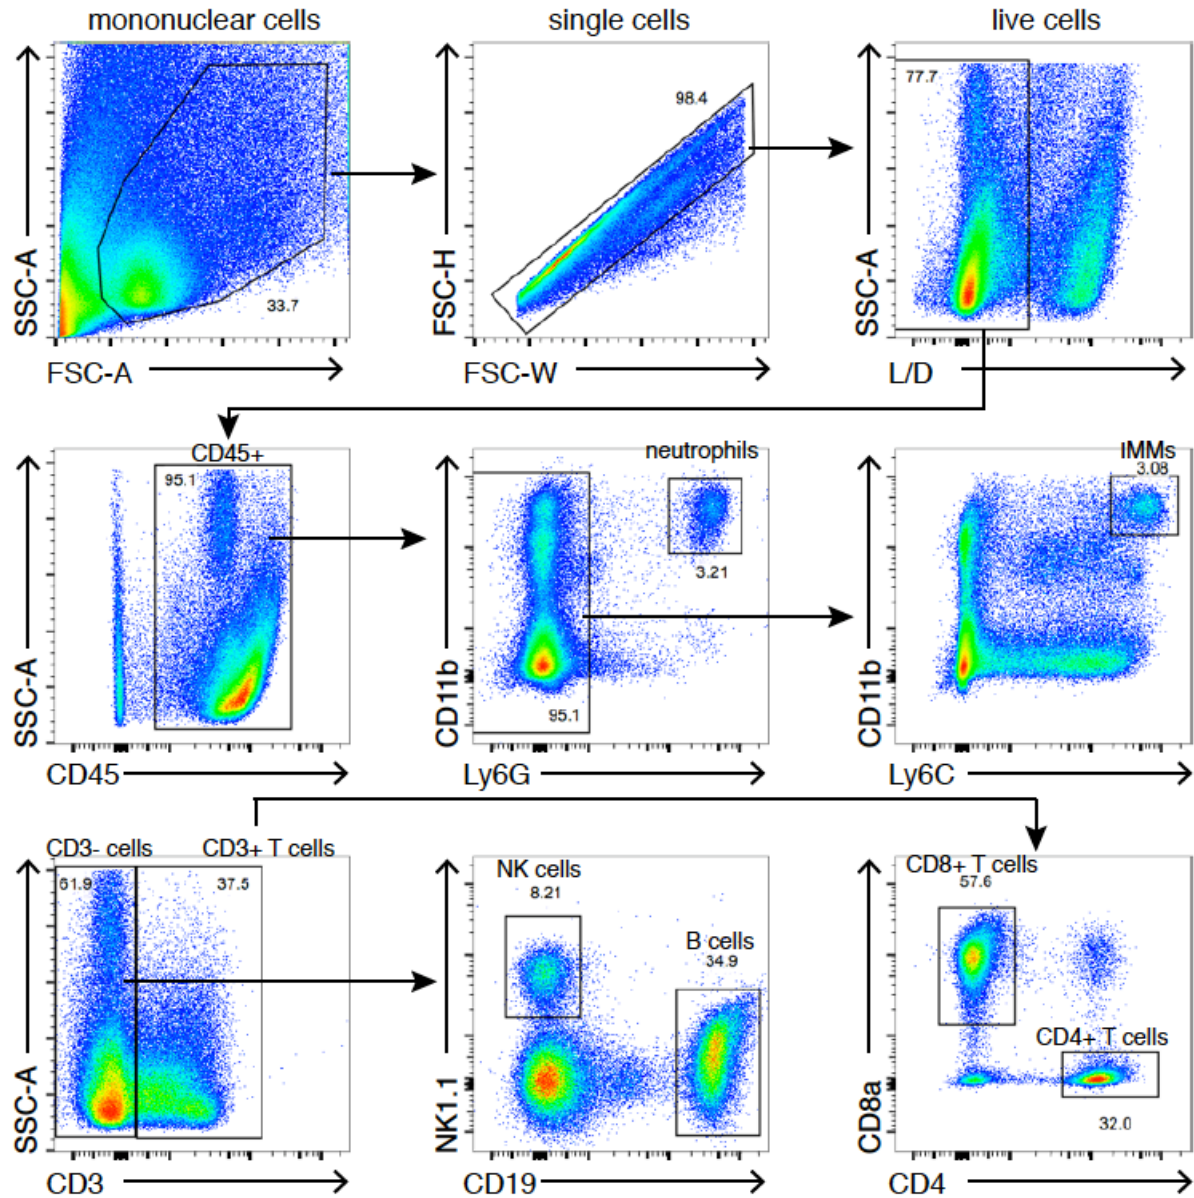

**Figure S2. Flow cytometric gating scheme for phenotyping immune cells in the lungs of  $DPP4^{H/M}$  infected with MERS-CoV.** Diabetic and control male and HFD and control female  $DPP4^{H/M}$  were infected intranasally with  $1.5 \times 10^5$  pfu of MERS-CoV Jordan. Lungs were collected at days 4, 7, 14, and 21 after infection or from uninfected mice and single cells were isolated from the tissue. Flow cytometric analysis was performed and analyzed to identify immune cell subsets in the lungs of uninfected and infected mice. Samples were gated on mononuclear cells, doublets were excluded, and live cells were identified. CD45+ cells were then

determined followed by subsequent subsetting into the various immune cell populations. CD3+ T cells (CD45+CD3+), CD4+ T cells (CD45+CD3+CD4+), CD8+ T cells (CD45+CD3+CD8+), B cells (CD45+CD3-CD19+), NK cells (CD45+CD3-NK1.1+), neutrophils (CD45+CD11b+Ly6G<sup>hi</sup>), and inflammatory monocyte/macrophages (IMMs, CD45+Ly6G-CD11b+Ly6C<sup>hi</sup>).

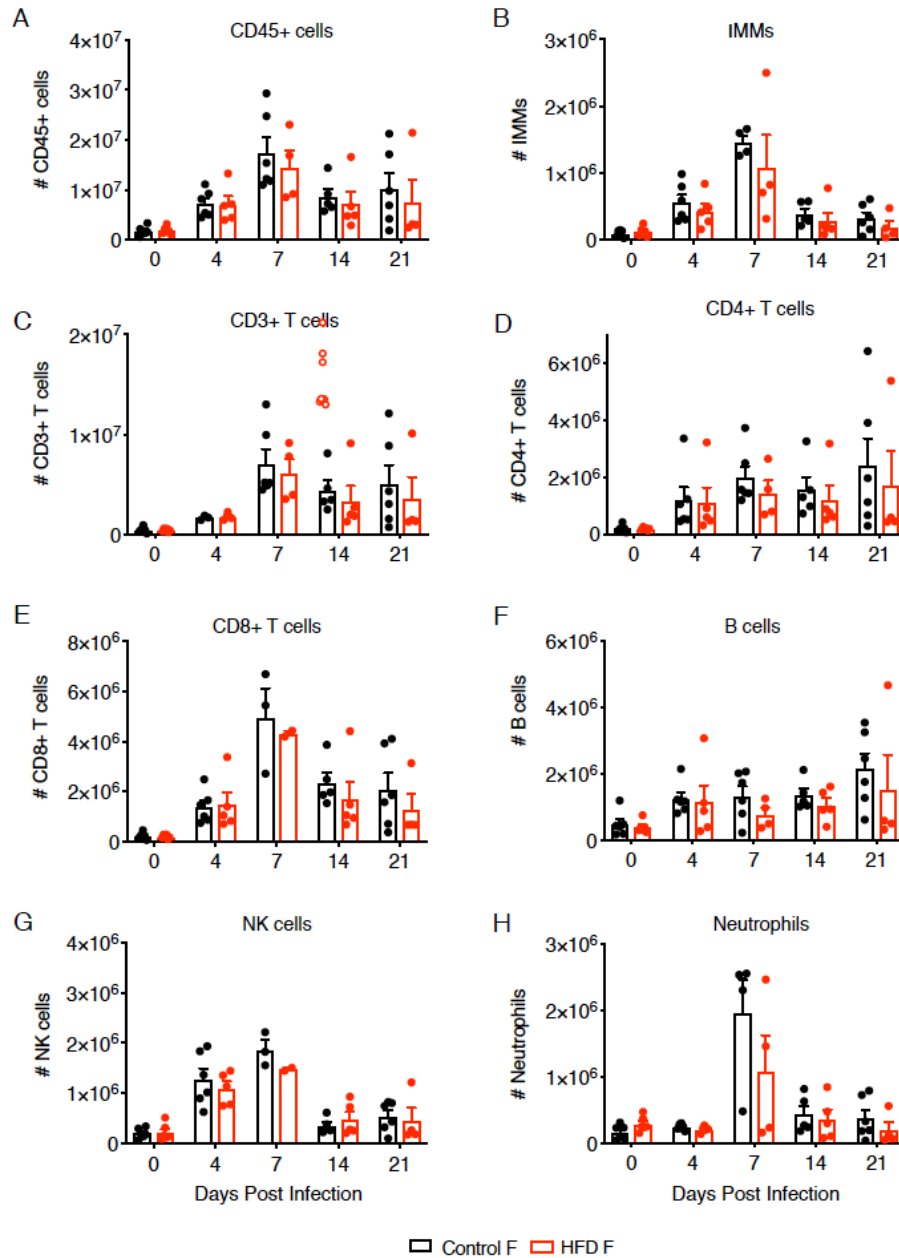

**Figure S3. HFD female mice have few changes in immune cell infiltration following MERS-CoV infection.** Female HFD and DPP4<sup>H/M</sup> were infected intranasally with  $1.5 \times 10^5$  pfu of MERS-CoV Jordan. Lungs were collected at days 4, 7, 14, and 21 after infection or from uninfected mice and single cells were isolated from the tissue. Flow cytometric analysis was performed on the cells isolated from the lung. The number of (A) CD45+ cells, (B) inflammatory monocytes/macrophages, (C) CD3+ T cells, (D) CD4+ T cells, (E) CD8+ T cells, (F) B cells, (G)

natural killer (NK) cells, and (H) neutrophils was determined. The data are pooled from 2 independent experiments, n= 3-9 mice/group. Data are presented as the mean and SEM. \*p<0.05 as determined by two-way ANOVA with Sidak's post test.

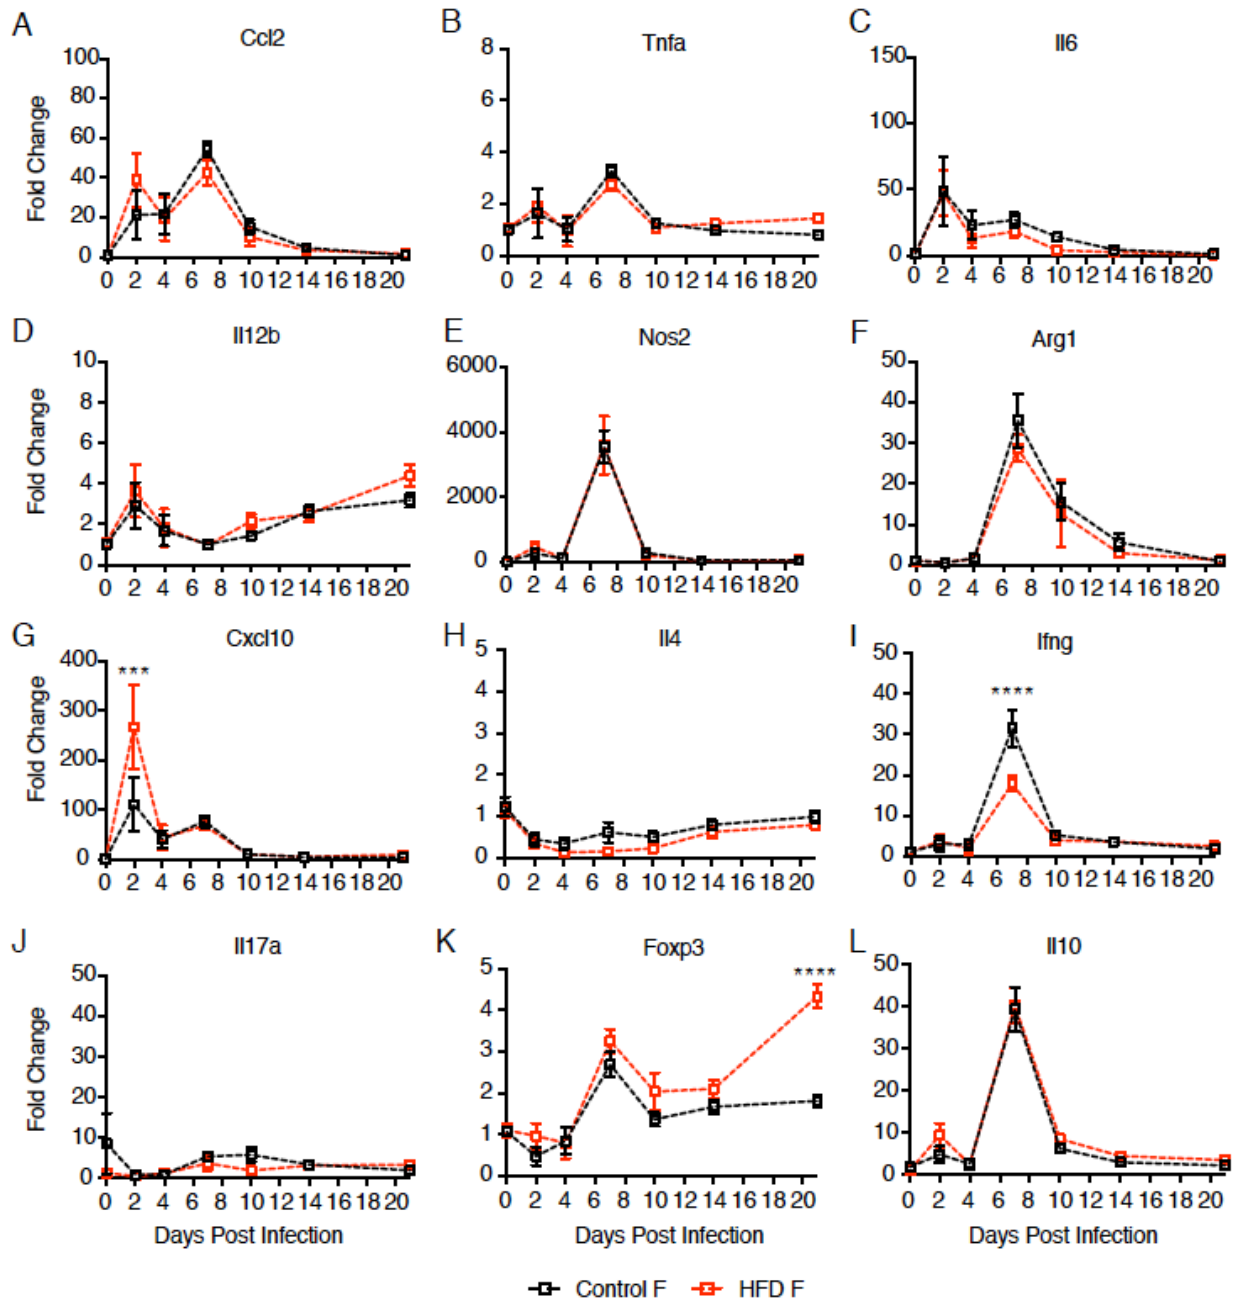

**Figure S4. Cytokine and chemokine gene expression in the lungs of female HFD  $DPP4^{H/M}$  mice following MERS-CoV infection.** Female HFD and control  $DPP4^{H/M}$  mice were infected intranasally with  $1.5 \times 10^5$  pfu of MERS-CoV Jordan. Lung tissue was collected as days 2, 4, 7, 10, 14, and 21 after infection and from PBS infected mice and was homogenized in trizol. RNA was isolated, cDNA was synthesized, and gene expression was determined using qPCR. Gene

expression was normalized to GAPDH and fold change was calculated relative to PBS infected mice. Gene expression was determined for (A) Ccl2; (B) Tnfa; (C) Il6; (D) Il12b; (E) Nos2; (F) Arg1; (G) Cxcl10; (H) Il4; (I) Ifng; (J) Il17a; (K) Foxp3; and (L) Il10. Data are pooled from 2-3 independent experiments, n= 3-16 mice/group. \*p<0.05, \*\*p<0.01, \*\*\*p<0.001, \*\*\*\*p<0.0001 as determined by two-way ANOVA with Sidak's post test.

|        |          | Found dead |              | Euthanized |              | Total deaths |              |
|--------|----------|------------|--------------|------------|--------------|--------------|--------------|
|        |          | Control    | Diabetic/HFD | Control    | Diabetic/HFD | Control      | Diabetic/HFD |
| Male   | # (%)    | 2/14 (14%) | 2/17 (12%)   | 3/14 (21%) | 0/17 (0%)    | 5/14 (36%)   | 2/17 (12%)   |
|        | M.D.O.D. | 10         | 8.5          | 11.7       | n.a.         | 11           | 8.5          |
| Female | # (%)    | 0/12 (0%)  | 0/14 (0%)    | 0/12 (0%)  | 0/14 (0%)    | 0/12 (0%)    | 0/14 (0%)    |
|        | M.D.O.D. | n.a.       | n.a.         | n.a.       | n.a.         | n.a.         | n.a.         |

\*M.D.O.D. is mean day of death

**Supplementary table 1. Mortality summary for DPP4<sup>H/M</sup> mice infected with a high dose of MERS-CoV.**

| Males (Control vs. Diabetic)             |     |          |          |                  |            |          |                  |           |          |                  |
|------------------------------------------|-----|----------|----------|------------------|------------|----------|------------------|-----------|----------|------------------|
| CD45+ cells                              |     | #        |          |                  |            |          |                  |           |          |                  |
|                                          | DPI | Control  | Diabetic | Adjusted p-value |            |          |                  |           |          |                  |
|                                          | 0   | 4.30E+06 | 2.67E+06 | 0.9909           |            |          |                  |           |          |                  |
|                                          | 4   | 8.19E+06 | 6.79E+06 | 0.9946           |            |          |                  |           |          |                  |
|                                          | 7   | 1.90E+06 | 1.26E+07 | 0.1683           |            |          |                  |           |          |                  |
|                                          | 14  | 9.50E+06 | 9.41E+06 | >0.9999          |            |          |                  |           |          |                  |
|                                          | 21  | 7.70E+06 | 6.61E+06 | 0.9974           |            |          |                  |           |          |                  |
| Inflammatory monocyte/macrophages (IMMs) |     | #        |          |                  | % of CD45+ |          |                  |           |          |                  |
|                                          | DPI | Control  | Diabetic | Adjusted p-value | Control    | Diabetic | Adjusted p-value |           |          |                  |
|                                          | 0   | 3.69E+05 | 2.22E+05 | 0.9678           | 7.92       | 8.43     | 0.9987           |           |          |                  |
|                                          | 4   | 7.55E+05 | 6.35E+05 | 0.9847           | 9.00       | 8.71     | >0.9999          |           |          |                  |
|                                          | 7   | 1.19E+06 | 5.13E+05 | 0.0122           | 6.21       | 4.32     | 0.6793           |           |          |                  |
|                                          | 14  | 4.35E+05 | 5.39E+05 | 0.9890           | 4.73       | 5.44     | 0.9898           |           |          |                  |
|                                          | 21  | 2.72E+05 | 2.56E+05 | >0.9999          | 3.98       | 3.73     | >0.9999          |           |          |                  |
| Natural killer (NK) cells                |     | #        |          |                  | % of CD45+ |          |                  |           |          |                  |
|                                          | DPI | Control  | Diabetic | Adjusted p-value | Control    | Diabetic | Adjusted p-value |           |          |                  |
|                                          | 0   | 3.53E+05 | 2.48E+05 | 0.9972           | 8.63       | 9.60     | 0.9865           |           |          |                  |
|                                          | 4   | 1.37E+06 | 1.55E+06 | 0.9689           | 16.42      | 21.66    | 0.0130           |           |          |                  |
|                                          | 7   | 1.90E+06 | 1.83E+06 | 0.9999           | 8.66       | 11.20    | 0.7914           |           |          |                  |
|                                          | 14  | 4.70E+05 | 5.37E+05 | 0.9995           | 5.26       | 5.52     | >0.9999          |           |          |                  |
|                                          | 21  | 4.19E+05 | 3.87E+05 | >0.9999          | 5.13       | 7.05     | 0.6804           |           |          |                  |
| Neutrophils                              |     | #        |          |                  | % of CD45+ |          |                  |           |          |                  |
|                                          | DPI | Control  | Diabetic | Adjusted p-value | Control    | Diabetic | Adjusted p-value |           |          |                  |
|                                          | 0   | 7.12E+05 | 3.43E+05 | 0.4952           | 14.87      | 13.92    | 0.9952           |           |          |                  |
|                                          | 4   | 2.58E+05 | 2.59E+05 | >0.9999          | 3.17       | 4.14     | 0.9938           |           |          |                  |
|                                          | 7   | 1.14E+06 | 9.09E+05 | 0.8741           | 5.54       | 6.86     | 0.9782           |           |          |                  |
|                                          | 14  | 5.11E+05 | 3.35E+05 | 0.9308           | 5.67       | 3.42     | 0.7552           |           |          |                  |
|                                          | 21  | 3.89E+05 | 2.69E+05 | 0.9865           | 5.36       | 3.98     | 0.9596           |           |          |                  |
| B cells                                  |     | #        |          |                  | % of CD45+ |          |                  |           |          |                  |
|                                          | DPI | Control  | Diabetic | Adjusted p-value | Control    | Diabetic | Adjusted p-value |           |          |                  |
|                                          | 0   | 1.12E+06 | 6.07E+05 | 0.8689           | 26.28      | 21.63    | 0.3799           |           |          |                  |
|                                          | 4   | 1.58E+06 | 9.49E+05 | 0.7089           | 19.73      | 14.69    | 0.2575           |           |          |                  |
|                                          | 7   | 1.54E+06 | 8.05E+05 | 0.5254           | 8.06       | 6.23     | 0.9590           |           |          |                  |
|                                          | 14  | 1.78E+06 | 1.19E+06 | 0.7101           | 19.47      | 12.97    | 0.0469           |           |          |                  |
|                                          | 21  | 1.96E+06 | 1.19E+06 | 0.4046           | 25.86      | 18.91    | 0.0216           |           |          |                  |
| CD3+ T cells                             |     | #        |          |                  | % of CD45+ |          |                  |           |          |                  |
|                                          | DPI | Control  | Diabetic | Adjusted p-value | Control    | Diabetic | Adjusted p-value |           |          |                  |
|                                          | 0   | 8.79E+05 | 5.32E+05 | 0.9998           | 22.15      | 19.75    | 0.9408           |           |          |                  |
|                                          | 4   | 2.64E+06 | 1.08E+06 | 0.9643           | 34.03      | 28.53    | 0.6824           |           |          |                  |
|                                          | 7   | 7.15E+06 | 5.52E+06 | 0.7998           | 36.05      | 43.28    | 0.0669           |           |          |                  |
|                                          | 14  | 4.14E+06 | 4.63E+06 | 0.9984           | 41.65      | 49.21    | 0.0366           |           |          |                  |
|                                          | 21  | 3.11E+06 | 3.07E+06 | >0.9999          | 40.98      | 43.88    | 0.7986           |           |          |                  |
| CD4+ T cells                             |     | #        |          |                  | % of CD45+ |          |                  | % of CD3+ |          |                  |
|                                          | DPI | Control  | Diabetic | Adjusted p-value | Control    | Diabetic | Adjusted p-value | Control   | Diabetic | Adjusted p-value |
|                                          | 0   | 4.03E+05 | 2.44E+05 | 0.9991           | 10.12      | 8.87     | 0.9858           | 46.8      | 47.7     | 0.9999           |
|                                          | 4   | 1.14E+06 | 5.54E+05 | 0.7289           | 14.07      | 8.03     | 0.0302           | 25.27     | 26.37    | 0.9997           |
|                                          | 7   | 2.25E+06 | 1.10E+06 | 0.0854           | 12.33      | 9.10     | 0.4802           | 35.65     | 21.06    | <0.0001          |
|                                          | 14  | 1.39E+06 | 1.35E+06 | >0.9999          | 13.60      | 14.17    | 0.9994           | 32.96     | 28.87    | 0.5595           |
|                                          | 21  | 1.22E+06 | 1.23E+06 | >0.9999          | 15.70      | 15.86    | >0.9999          | 38.43     | 35.69    | 0.8519           |
| CD8+ T cells                             |     | #        |          |                  | % of CD45+ |          |                  | % of CD3+ |          |                  |
|                                          | DPI | Control  | Diabetic | Adjusted p-value | Control    | Diabetic | Adjusted p-value | Control   | Diabetic | Adjusted p-value |
|                                          | 0   | 3.88E+05 | 2.30E+05 | 0.9999           | 9.73       | 8.58     | 0.9714           | 44.1      | 42.77    | 0.9986           |
|                                          | 4   | 1.43E+06 | 1.06E+06 | 0.9902           | 17.53      | 14.67    | 0.3891           | 54.77     | 45.57    | 0.1422           |
|                                          | 7   | 5.47E+06 | 4.41E+06 | 0.8194           | 21.97      | 25.73    | 0.4373           | 52.53     | 58.88    | 0.4278           |
|                                          | 14  | 2.29E+06 | 2.64E+06 | 0.9912           | 23.65      | 28.34    | 0.0200           | 56.54     | 57.63    | 0.9965           |
|                                          | 21  | 1.51E+06 | 1.36E+06 | 0.9998           | 20.14      | 20.56    | 0.9995           | 49        | 47.3     | 0.9693           |

Supplementary table 2. Summary of flow cytometry statistics for immune cell populations in the lungs of male diabetic and control DPP4<sup>H/M</sup> mice during MERS-CoV infection.

| Female (Control vs. HFD)                 |          |          |          |                  |            |         |                  |           |         |                  |
|------------------------------------------|----------|----------|----------|------------------|------------|---------|------------------|-----------|---------|------------------|
| CD45+ cells                              |          | #        |          |                  |            |         |                  |           |         |                  |
|                                          | DPI      | Control  | HFD      | Adjusted p-value |            |         |                  |           |         |                  |
|                                          | 0        | 1.81E+06 | 1.94E+06 | >0.9999          |            |         |                  |           |         |                  |
|                                          | 4        | 7.25E+06 | 7.15E+06 | >0.9999          |            |         |                  |           |         |                  |
|                                          | 7        | 1.74E+07 | 1.44E+07 | 0.9175           |            |         |                  |           |         |                  |
|                                          | 14       | 8.63E+06 | 7.18E+06 | 0.9963           |            |         |                  |           |         |                  |
| 21                                       | 1.02E+07 | 7.51E+06 | 0.9468   |                  |            |         |                  |           |         |                  |
| Inflammatory monocyte/macrophages (IMMs) |          | #        |          |                  | % of CD45+ |         |                  |           |         |                  |
|                                          | DPI      | Control  | HFD      | Adjusted p-value | Control    | HFD     | Adjusted p-value |           |         |                  |
|                                          | 0        | 9.93E+04 | 1.25E+05 | >0.9999          | 5.53       | 6.27    | 0.9722           |           |         |                  |
|                                          | 4        | 5.58E+05 | 4.37E+05 | 0.9807           | 7.58       | 5.90    | 0.5786           |           |         |                  |
|                                          | 7        | 1.46E+06 | 1.09E+06 | 0.4613           | 8.18       | 6.87    | 0.8775           |           |         |                  |
|                                          | 14       | 3.94E+05 | 2.85E+05 | 0.9901           | 4.62       | 3.66    | 0.9421           |           |         |                  |
| 21                                       | 3.26E+05 | 1.97E+05 | 0.9801   | 3.38             | 3.28       | >0.9999 |                  |           |         |                  |
| Natural killer (NK) cells                |          | #        |          |                  | % of CD45+ |         |                  |           |         |                  |
|                                          | DPI      | Control  | HFD      | Adjusted p-value | Control    | HFD     | Adjusted p-value |           |         |                  |
|                                          | 0        | 2.00E+05 | 2.16E+05 | >0.9999          | 11.99      | 10.53   | 0.9644           |           |         |                  |
|                                          | 4        | 1.27E+06 | 1.09E+06 | 0.8783           | 17.40      | 16.60   | 0.9981           |           |         |                  |
|                                          | 7        | 1.86E+06 | 1.47E+06 | 0.6565           | 8.30       | 7.56    | 0.9998           |           |         |                  |
|                                          | 14       | 3.55E+05 | 4.74E+05 | 0.9842           | 4.10       | 6.80    | 0.7512           |           |         |                  |
| 21                                       | 5.34E+05 | 4.55E+05 | 0.9978   | 5.88             | 6.69       | 0.9985  |                  |           |         |                  |
| Neutrophils                              |          | #        |          |                  | % of CD45+ |         |                  |           |         |                  |
|                                          | DPI      | Control  | HFD      | Adjusted p-value | Control    | HFD     | Adjusted p-value |           |         |                  |
|                                          | 0        | 1.73E+05 | 2.97E+05 | 0.9930           | 9.24       | 15.83   | 0.0003           |           |         |                  |
|                                          | 4        | 2.50E+05 | 2.17E+05 | >0.9999          | 3.91       | 3.38    | 0.9988           |           |         |                  |
|                                          | 7        | 1.97E+06 | 1.08E+06 | 0.0359           | 9.48       | 6.00    | 0.2795           |           |         |                  |
|                                          | 14       | 4.35E+05 | 3.68E+05 | 0.9998           | 4.90       | 4.83    | >0.9999          |           |         |                  |
| 21                                       | 3.85E+05 | 2.10E+05 | 0.9806   | 3.60             | 3.04       | 0.9987  |                  |           |         |                  |
| B cells                                  |          | #        |          |                  | % of CD45+ |         |                  |           |         |                  |
|                                          | DPI      | Control  | HFD      | Adjusted p-value | Control    | HFD     | Adjusted p-value |           |         |                  |
|                                          | 0        | 4.91E+05 | 4.08E+05 | >0.9999          | 26.27      | 21.03   | 0.3205           |           |         |                  |
|                                          | 4        | 1.25E+06 | 1.16E+06 | >0.9999          | 17.70      | 13.63   | 0.6346           |           |         |                  |
|                                          | 7        | 1.35E+06 | 7.84E+05 | 0.8482           | 7.78       | 5.33    | 0.9492           |           |         |                  |
|                                          | 14       | 1.36E+06 | 1.07E+06 | 0.9883           | 16.26      | 16.80   | >0.9999          |           |         |                  |
| 21                                       | 2.15E+06 | 1.53E+06 | 0.7820   | 25.05            | 17.88      | 0.1418  |                  |           |         |                  |
| CD3+ T cells                             |          | #        |          |                  | % of CD45+ |         |                  |           |         |                  |
|                                          | DPI      | Control  | HFD      | Adjusted p-value | Control    | HFD     | Adjusted p-value |           |         |                  |
|                                          | 0        | 4.71E+05 | 4.45E+05 | >0.9999          | 25.35      | 23.37   | 0.9502           |           |         |                  |
|                                          | 4        | 1.70E+06 | 1.81E+06 | >0.9999          | 34.20      | 36.00   | 0.9929           |           |         |                  |
|                                          | 7        | 7.12E+06 | 6.12E+06 | 0.9879           | 40.58      | 42.70   | 0.9589           |           |         |                  |
|                                          | 14       | 4.41E+06 | 3.41E+06 | 0.9866           | 49.94      | 44.12   | 0.2199           |           |         |                  |
| 21                                       | 5.12E+06 | 3.56E+06 | 0.9201   | 45.77            | 47.90      | 0.9576  |                  |           |         |                  |
| CD4+ T cells                             |          | #        |          |                  | % of CD45+ |         |                  | % of CD3+ |         |                  |
|                                          | DPI      | Control  | HFD      | Adjusted p-value | Control    | HFD     | Adjusted p-value | Control   | HFD     | Adjusted p-value |
|                                          | 0        | 2.05E+05 | 1.92E+05 | >0.9999          | 11.10      | 10.41   | 0.9996           |           |         |                  |
|                                          | 4        | 1.19E+06 | 1.10E+06 | >0.9999          | 14.47      | 12.82   | 0.9804           | 29.57     | 25.30   | 0.7876           |
|                                          | 7        | 1.98E+06 | 1.42E+06 | 0.9737           | 11.35      | 9.35    | 0.9660           | 28.07     | 22.08   | 0.2947           |
|                                          | 14       | 1.56E+06 | 1.19E+06 | 0.9951           | 17.12      | 15.68   | 0.9912           | 33.82     | 35.46   | 0.9792           |
| 21                                       | 2.39E+06 | 1.71E+06 | 0.9365   | 20.10            | 19.08      | 0.9984  | 43.35            | 39.90     | 0.7738  |                  |
| CD8+ T cells                             |          | #        |          |                  | % of CD45+ |         |                  | % of CD3+ |         |                  |
|                                          | DPI      | Control  | HFD      | Adjusted p-value | Control    | HFD     | Adjusted p-value | Control   | HFD     | Adjusted p-value |
|                                          | 0        | 2.17E+05 | 1.83E+05 | >0.9999          | 11.48      | 9.46    | 0.7265           |           |         |                  |
|                                          | 4        | 1.37E+06 | 1.46E+06 | >0.9999          | 18.45      | 19.16   | 0.9968           | 49.15     | 47.30   | 0.9790           |
|                                          | 7        | 4.95E+06 | 4.31E+06 | 0.9763           | 20.83      | 22.15   | 0.9917           | 52.80     | 51.20   | 0.9954           |
|                                          | 14       | 2.34E+06 | 1.71E+06 | 0.8983           | 27.22      | 22.58   | 0.0689           | 54.92     | 51.38   | 0.7489           |
| 21                                       | 2.08E+06 | 1.28E+06 | 0.7818   | 19.93            | 21.25      | 0.9616  | 44.12            | 44.25     | >0.9999 |                  |

Supplementary table 3. Summary of flow cytometry statistics for immune cell populations in the lungs of female HFD and control DPP4<sup>H/M</sup> mice during MERS-CoV infection.
